# Supplementary material for: Exception to the Rule: Genomic Characterization of Naturally Occurring Unusual Vibrio cholerae Strains with a Single Chromosome
Source: Int J Genomics. 2017 Aug 29;2017:8724304. doi: 10.1155/2017/8724304 (PMC5603330; doi:10.1155/2017/8724304)
Supplement: Supplementary file 2 [file 8724304.f2.xlsx]

## Sheet: Table S1
Table_S1. Whole Genome Sequence Statistics of NSCV1 and NSCV2
Strain	NSCV-1 ((1154-74 (O49) VAA))				NSCV-2 ((10432-62 (O27) VAB))
Sequencing platform	Roche 454 (a)	Roche 454 (b)	Illumina	PacBio RS	Roche 454 (a)	Roche 454 (b)	Illumina	PacBio RS
Sequencing detail	Titanium	Titanium	GA iiX	P4-C2	Titanium	Titanium	GA iiX	P5-C3
Library Type	Fragments	Long-Insert Pairs	Fragments	Fragments	Fragments	Long-Insert Pairs	Fragments	Fragments
Assembly Statistics
Mean Read Length (bps)	306	164	100	5966	396	167	76	4458
Total Reads	307619	286661	82893269	145955	219494	145870	26677286	340387
Total bps	94151248	47134856	8289326900	870847956	86989637	24404545	2027473736	1517667722
Average Insert size	n/a	9,528 ± 2,382	n/a	n/a	n/a	5,340 ± 1,335	n/a	n/a
Total PE reads	n/a	124071	n/a	n/a	n/a	57858	n/a	n/a
Depth of coverage (×)	21		2178	201	17		507	350
Genomic features of the final sequence
SRA Accession Number	SPR061796				SPR061797
GenBank Accession Number	NZ_CP010811.1				NZ_CP010812.1
Total Genome size (bps)	3928357				4077462
GC content (%)	47.8				47.7
Genes	3641				3795
Coding DNA Sequences	3458				3585
CDS with assigned function	2882				2894
Percentage of CDS with assigned function	83.3				80.7
# hypothetical proteins	576				691
Pseudo Genes	41				89
# rRNA	31				22
# tRNA	104				94
ncRNA	1				1
Frameshifted Genes	27				56
Frameshifted Genes On Monomer Runs	6				9
Frameshifted Genes Not on Monomer Runs	2				0
Optical Map Estimate	3889393				3801481

## Sheet: Table_S2
Table_S2. Nucmer based pairwise comparison of genome sequences
Query\ref	NSCV1	NSCV2	N16961	TSY216	MS6	MO10
NSCV1		11.61/88.39	8.33/91.67	26.43/73.57	8.61/91.84	10.61/89.39
NSCV2	7.50/92.50		8.70/91.30	26.66/73.34	8.53/91.47	10.82/89.18
N16961	5.70/94.30	9.96/90.04		19.96/80.04	1.23/98.77	4.35/95.65
TSY216	5.81/94.19	10.01/89.99	0.37/99.63		1.44/98.56	2.93/97.07
MS6	5.63/94.37	10.04/89.96	1.40/98.60	20.92/79.08		5.52/94.48
MO10	6.34/93.66	10.40/89.60	2.20/97.80	20.15/79.85	3.18/96.82
Two way pairwise comparison and percentage of unique/shared sequences between the genome sequences

## Sheet: Table_S3
Table_S3. Unique Regions ~10 Kb and over in NSCV1, NSCV2 and N16961 in comparison to others genomes
NSCV1					NSCV2					N16961-Chr_1 and Chr_2
Feature	Annotation	Start	End	Size	Feature	Annotation	Start	End	Size	Feature	Annotation	Start	End	Size
1	UR_1	193223	203529	10306	1	UR_1	297222	337551	40329	1	VSP-1	175198	189459	14261
2	Prophage_1	685729	702622	16893	2	Prophage_1	299327	349041	49714	2	wbe	249000	260427	11427
3	UR_2_PTS	1121690	1131437	9747	3	Chr_2	297221	1375947	1078726	3	VSP-2	522877	550186	27309
4	UR_3_RTX	1290731	1301721	10990	4	Prophage_2	1359430	1369981	10551	4		865209	874265	9056
5	UR_4	1446108	1476589	30481	5	UR_2	1359610	1370754	11144		VPI-1	875011	914239	39228
6	Prophage_2	1458739	1476484	17745	6	UR_3_HSD	1575177	1585466	10289	5	VPI-2	1895816	1953315	57499
7	UR_5	1765808	1798451	32643	7	UR_4	1587780	1610634	22854	6	PTS System	1960947	1970701	9754
8	Prophage_3	1756187	1818403	62216	8	UR_5	1676773	1710753	33980	7	Chr_1	1-2961149		2961149
9	Prophage_4	1879405	1883642	4237	9	Prophage_3	1676903	1714350	37447	8	Ori_1	2961047-2961149	1-371	474
10	Chr_2	1720246	2772395	1052149	10	UR_6_RTX	2451538	2462245	10707		Rep_Ori_Chr_1	2956820-2961149	1-806	5136
11	Prophage_5	2643793	2650802	7009	11	UR_7_TTSS	2616566	2665918	49352	9	Chr_2	2961150-4033464		1072315
12	UR_6	2955772	2968930	13158	12	Prophage_4	3113341	3130219	16878	10	Ori_2	2961396-2962282		887
13	UR_7_HSD	3195919	3205927	10008	13	UR_8	3416243	3427115	10872		Rep_Ori_Chr_2	2961150-2964340	4030845-4033464	5811
14	wb*_region	3777887	3815081	37194	14	Prophage_5	3416918	3428588	11670	11	Prophage_1	1546757	1577272	30515
15	UR_8	3783110	3812259	29149	15	UR_9_CPS	3878812	3888045	9233	12	Prophage_2	1935801	1946144	10343
					16	UR_10	3892943	3914220	21277	13	Super Integron	3270899	3396567	125668
					17	wb*_region	3888709	3920844	32135
					18	UR_11_HSD	3949310	3969802	20492
					19	UR_12_SXT	4044299	4070910	26611

## Sheet: Table_S5
Table_S5. Summary of nucleotide and amino acid changes in origins of replication genes and corresponding proteins
Summary of nucleotide changes								Summary of amino acid changes
				Same alleles							Same alleles
Locus ID in O1	Gene	Size	No of mutations	O1/O49	O1/O27	O27/O49	Different alleles#	Protein	Size	Position	N16961_O1	1154-74_O49	10432-62_O27
	OriI	5136*		42	41	33		ParB	293	35	A	V	A
VC2772	parB	882	8	2	4	2				103	Q	L	Q
VC2773	parA	774	6	0	1	5		ParA	257	1	V	M	M
VC2774	gidB	633	12	2	4	6				25	A	S	A
VC2775	gidA	1896	21	9	3	9		GidB	210	77	S	T	T
	oriCI	474	8	1	4	3				98	I	L	L
VC0002	mioC	435	3	2	1	0				162	A	A	G
	Total		58	16	17	25		GidA	631	361	Y	F	F
										464	A	A	V
								MioC	144	None
	OriII	5811**		65	58	59
VCA1113	VCA1113	263	5	0	2	3		VCA1113	87	None
	ig	59	3	0	3	0		ParB	324	None
VCA1114	parB	972	9	1	6	2		ParA	406	None
VCA1115	parA	1218	9	2	5	2		RctA	45	19	R	Q	R
	ig1	143	6	3	3	0				31	I	N	I
VCA0001	rctA	135	2	0	2	0		RctB	659	393	T	A	A
	ig2	887	15	4	2	8	1			433	D	E	D
VCA0002	rctB	1977	41	15	9	16	1
	Total		90	25	32	31
* D1 bp in OriCI in O49
** 1 bp insertion in O49, 2 bps deletion in O27
#Different alleles in each strain

## Sheet: Table_S6
Table_S6. Summary of nucleotide and amino acid changes in replication associated and mismatch repair genes and corresponding proteins
Summary of nucleotide changes								Summary of amino acid changes
				Same alleles							Same alleles
Locus ID in O1	Gene	Size	No of mutations	O1/O49	O1/O27	O27/O49	Different alleles#	Protein	Size	Position	N16961_O1	1154-74_O49	10432-62_O27
	dnaA	1419	64	0	D 1-15			DnaA	472	3-7	WT	DEGIVS
				28	5	16
VC2626	dam	834	12	5	2	5		Dam	277	0
VC0543	recA	1065	34	9	8	17		RecA	354	305	Y	C	C
VC0668	mutH	666	12	2	6	4		MutH	221	158	W	L	W
VC0345	mutL	1962	25	12	3	10				200	A	T	T
VC0535	mutS (O1)	2589	94	24	36	33	1	MutL	653	46	L	I	I
	mutS (O27)	2579	D (386-395)							90	M	V	M
VC0128	xerC	936	13	2	4	7				281	V	A	A
VC2419	xerD	909	19	4	7	8				332	G	S	S
										363	D	E	E
										396	P	Q	Q
										448	P	A	P
										465	I	I	T
								MutS (O1/O49)	862	0
								MutS (O27)	842	11	S	S	Y
										129	L	L	R
										130	L	L	E
										132-150	WT	WT	D
										151	A	A	I
										236	K	K	Q
										408	D	N	D
										543	M	L	L
										582	E	K	E
								XerC	311	6	R	L	L
										103	Q	E	Q
										166	I	V	V
								XerD	302	0
